# Supplementary material for: Congenital goitrous hypothyroidism is caused by dysfunction of the iodide transporter SLC26A7
Source: PubMed Central journal article supplement (PMC6656751; doi:10.1038/s42003-019-0503-6), 2019-07-24
Supplement: 42003_2019_503_MOESM4_ESM.pdf [file 42003_2019_503_MOESM4_ESM.pdf]

1 **Supplementary Figure 1**

2

3

4

5

6

7

8

9

10

11

12

13

14

15

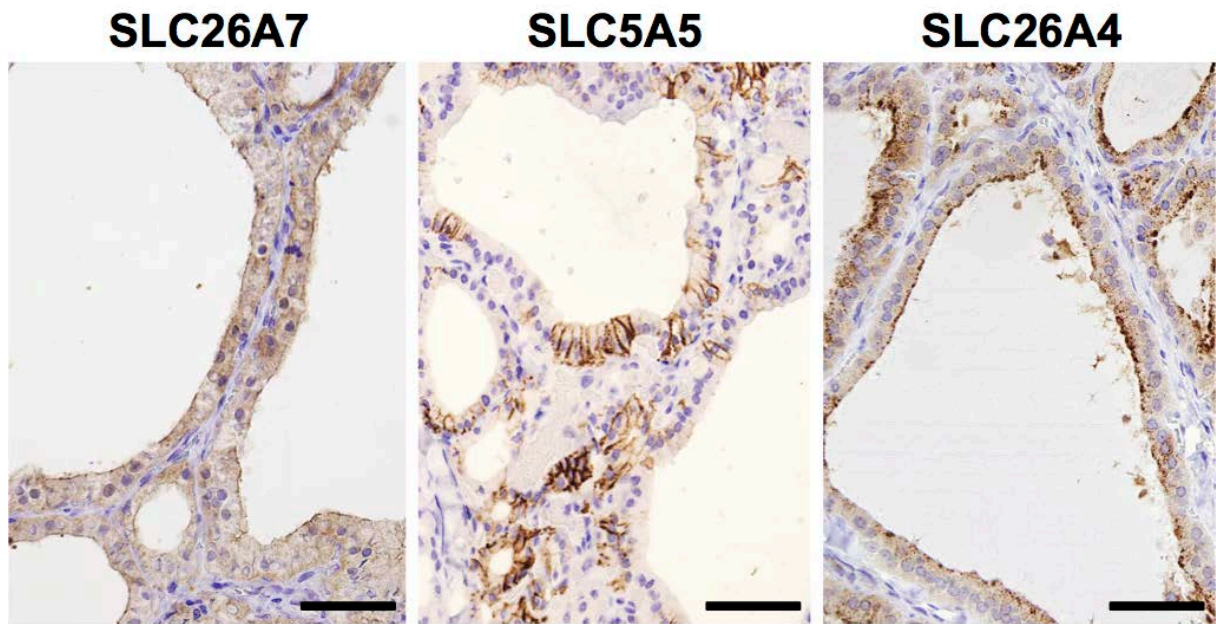

16 Supplementary Figure 1. Immunohistochemical staining of SLC26A7 (left), SLC5A5

17 (centre), and SLC26A4 (right) in thyroid tissues. Scale bar, 50  $\mu$ m.

18

19 **Supplementary Figure 2**

20

21

22

23

24

25

26

27

28

29

30

31

32

33

34

35

36

37

38

39

40

41

42 **Supplementary Figure 2. Uncropped gel image in Figure 1b.**

43

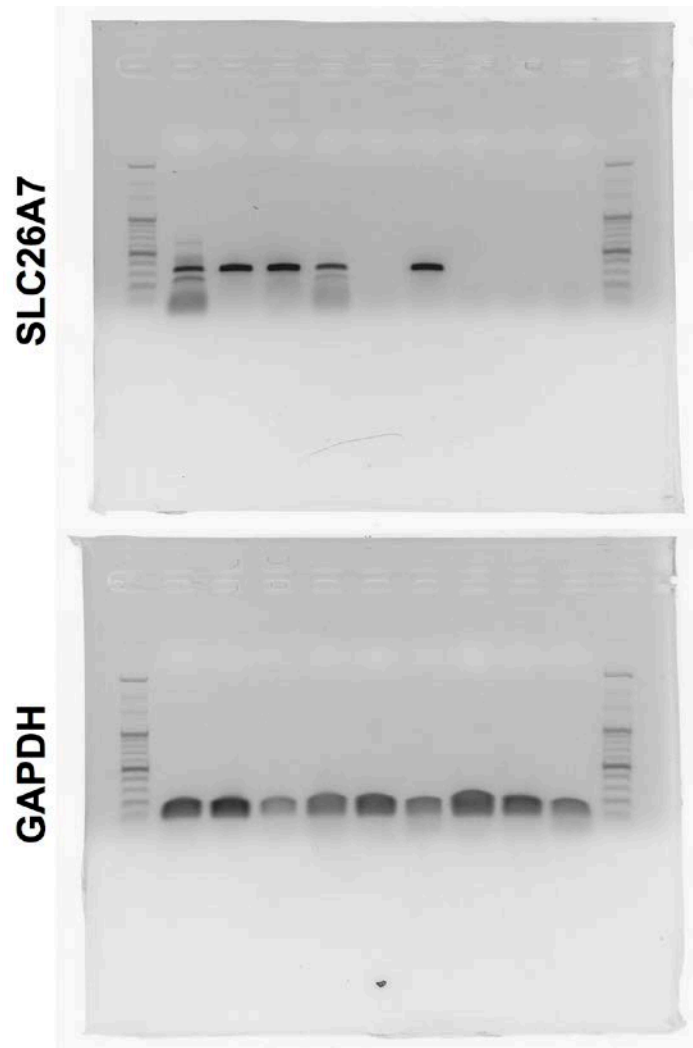

44 **Supplementary Figure 3**

45

46

47

48

49

50

51

52

53

54

55

56

57

58

59

60

61

62

63

64

65

66

67 Supplementary Figure 3. Immunoblot analysis to confirm the gene transduction of *SLC26A7*

68 and *SLC26A4* and *SLC5A5* in MDCK cells. Sodium potassium ATPase served as an internal

69 control. dox, doxycycline; G-SLC26A7, glycosylated SLC26A7.

70

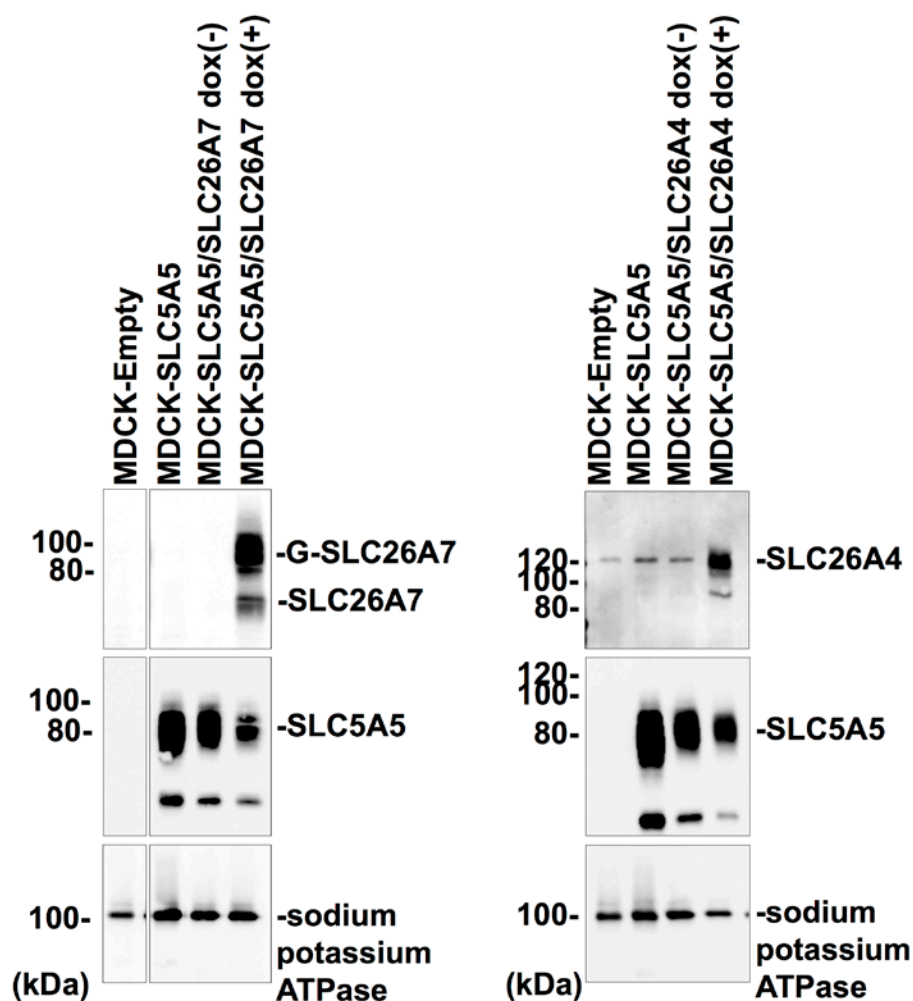

71 **Supplementary Figure 4**

72

73

74

75

76

77

78

79

80

81

82

83

84

85

86

87 Supplementary Figure 4. Immunoblot analysis of SLC5A5 in SLC5A5 or SLC5A5 and  
88 SLC26A7 (SLC5A5/SLC26A7), or SLC5A5 and SLC26A4 (SLC5A5/ SLC26A4) in  
89 inducible COS-7, Nthy and WRO cells in the absence or presence of the inducer  
90 doxycycline (dox(-), dox(+)) respectively).

91

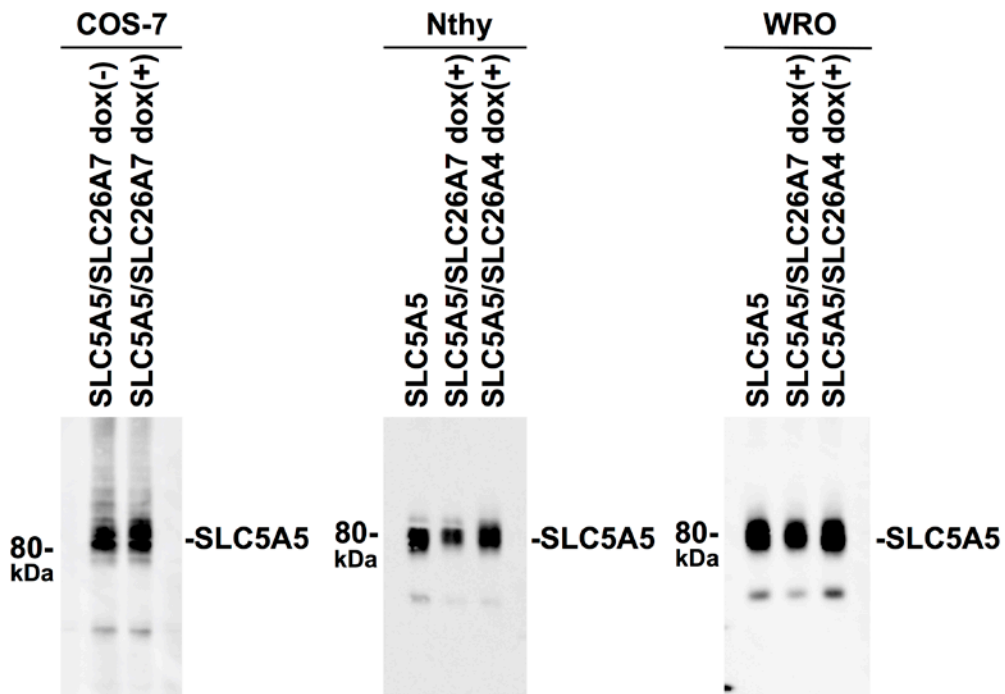

92 **Supplementary Figure 5**

93

94

95

96

97

98

99

100

101

102

103

104

105

106

107

108

109

110

111

112

113

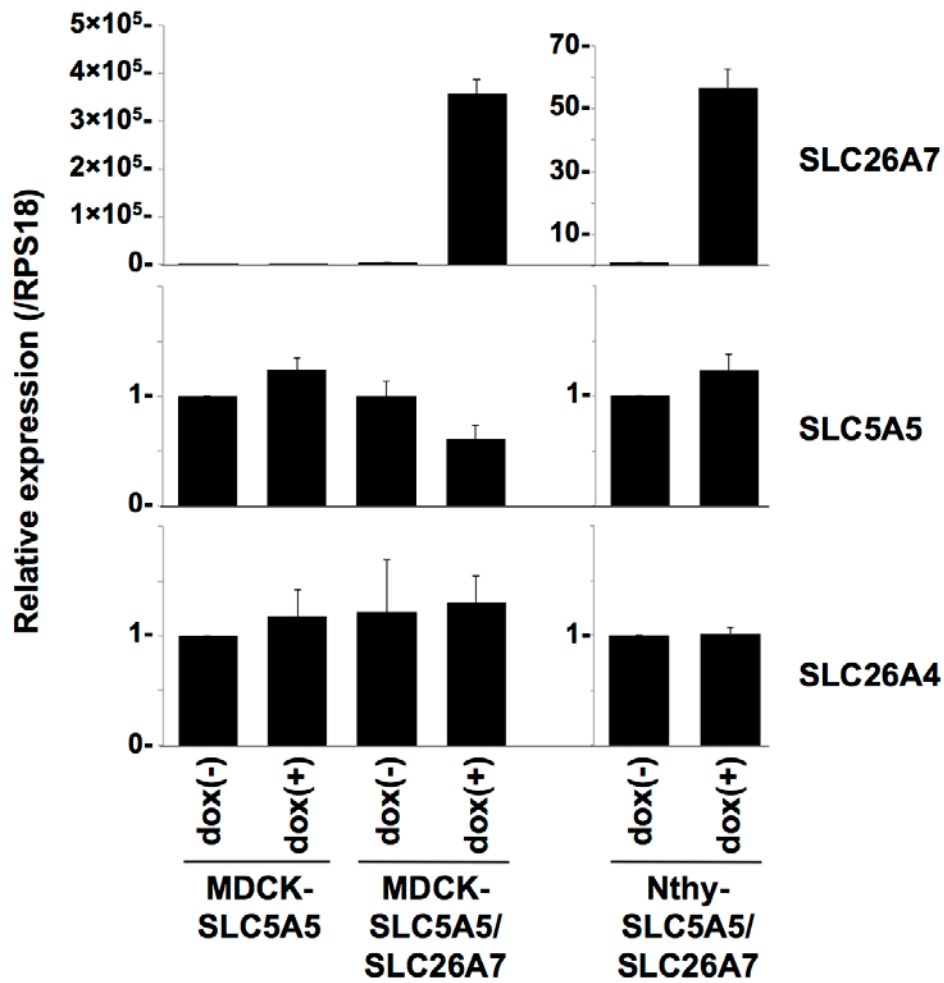

114 Supplementary Figure 5. Semiquantitative RT-PCR analysis of SLC26A7, SLC5A5, and  
 115 SLC26A4 mRNA expression in SLC5A5-inducible or SLC5A5 and SLC26A7  
 116 (SLC5A5/SLC26A7)-inducible MDCK and Nthy cells. Data are shown as means±SD. dox,  
 117 doxycycline. SLC5A5 and SLC26A4 expression were not greatly affected by *SLC26A7*  
 118 induction.

119

120 **Supplementary Figure 6**

121

122

123

124

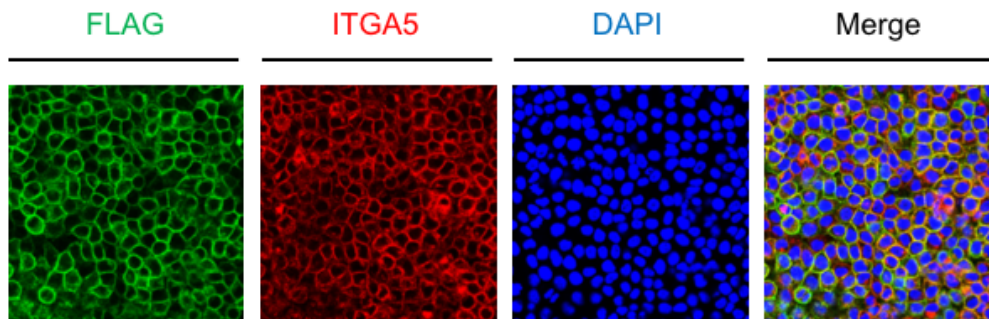

125

126

127

128

129

130

131

132

133

134 Supplementary Figure 6. Immunofluorescence analysis of FLAG (green) and ITGA5

135 (integrin subunit alpha 5, red) in FLAG-tagged SLC26A7 WT-transfected HeLa cells.

136 4',6-diamidino-2-phenylindole, DAPI (blue) marks cell nuclei. Note SLC26A7 WT protein

137 colocalized with the plasma membrane protein IGTA5.

138

139 **Supplementary Figure 7**

140

141

142

143

144

145

146

147

148

149

150

151

152

153

154

155

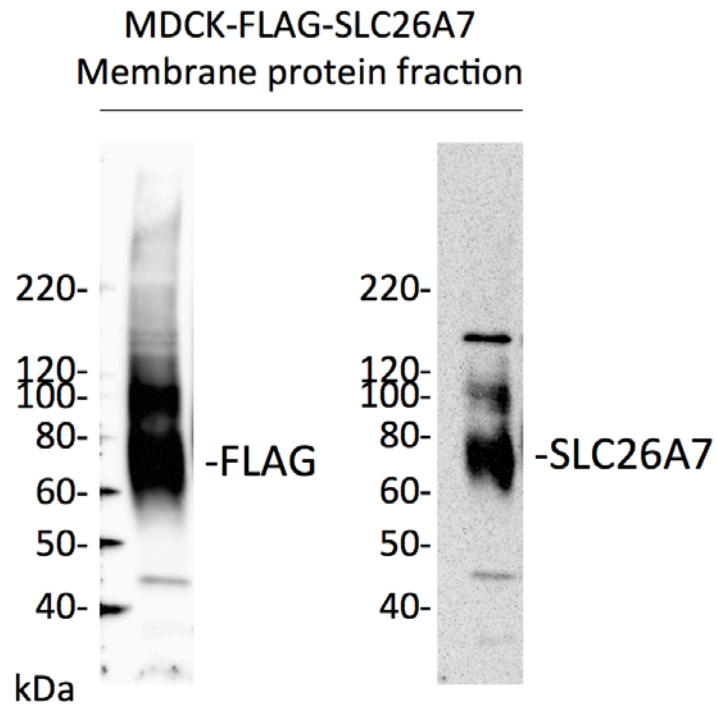

156 Supplementary Figure 7. Immunoblot analysis to confirm whether SLC26A7 is expressed

157 on the cell membrane. Membrane protein fraction was extracted using a membrane protein

158 isolation kit (Pierce Cell Surface Protein Isolation Kit, Thermo Fisher Scientific) from

159 FLAG-tagged SLC26A7-inducible MDCK cells. FLAG-tagged SLC26A7 was detected in

160 membrane protein fraction.

161

162 **Supplementary Figure 8**

163

164

165

166

167

168

169

170

171

172

173

174

175

176

177

178

179 Supplementary Figure 8. Schematic for identifying candidate homozygous or compound

180 heterozygous rare variants in genes.

181

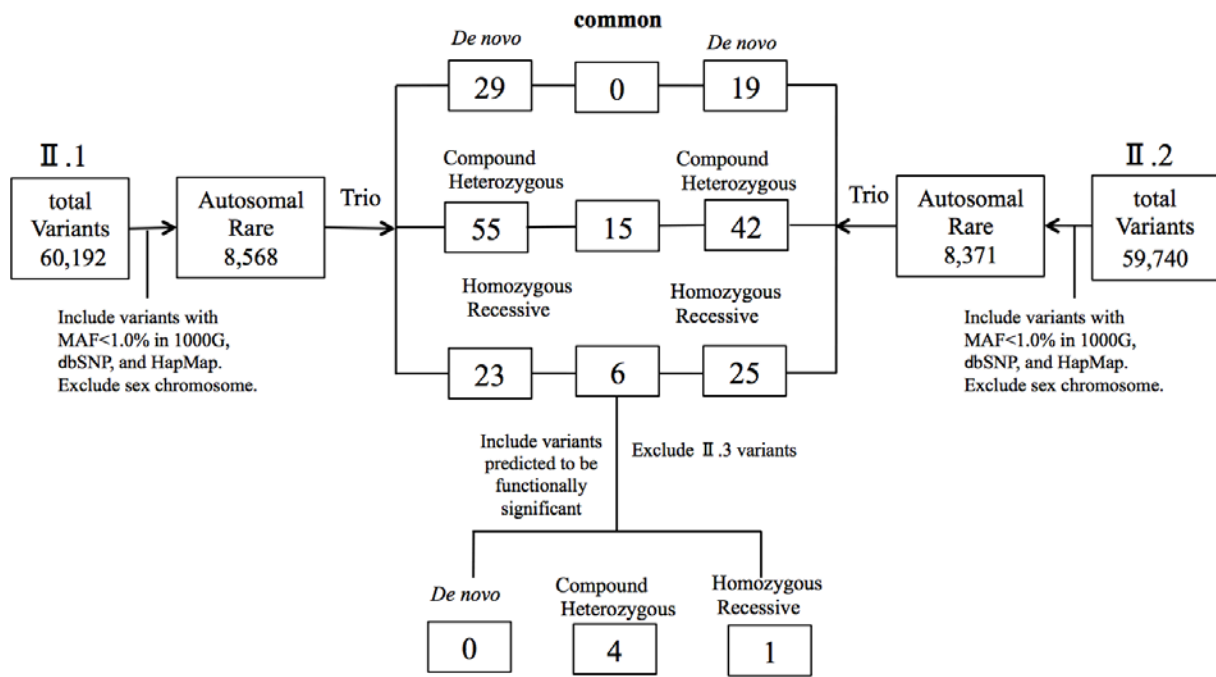

Supplementary Figure 8. Schematic for identifying candidate homozygous or compound heterozygous rare variants in genes.



182 **Supplementary Figure 9**

183

184

185

186

187

188

189

190

191

192

193

194

195

196

197

198

199

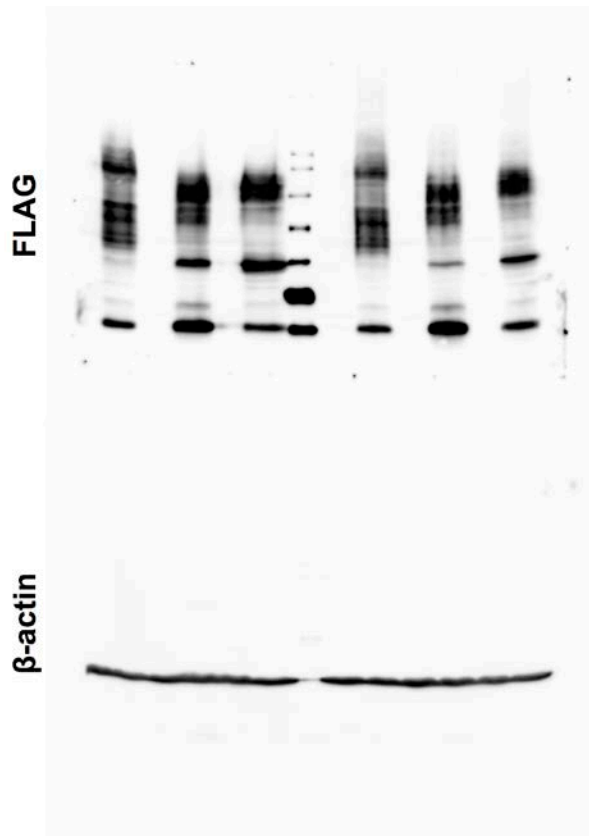

200 Supplementary Figure 9. Uncropped blot image in Figure 5a.

201

202 **Supplementary Figure 10**

203

204

205

206

207

208

209

210

211

212

213

214

215

216

217

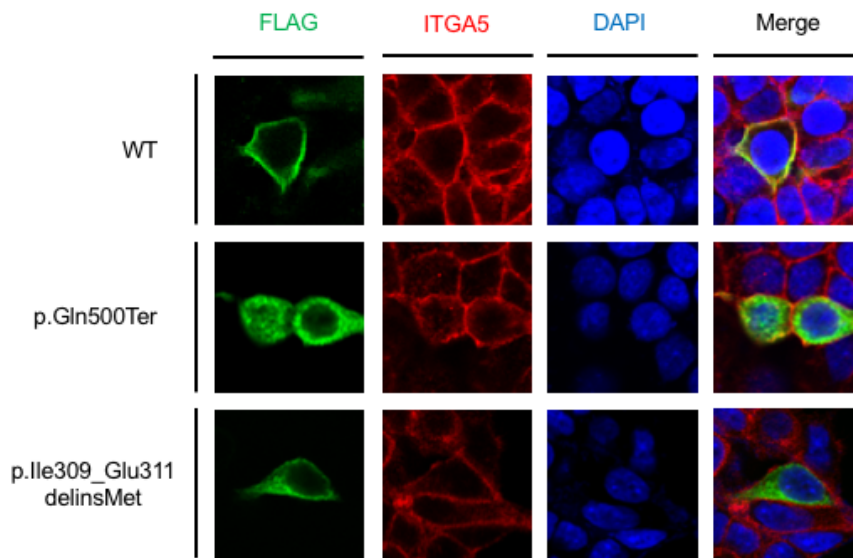

218 Supplementary figure 10. Immunofluorescence analysis of FLAG (green) and ITGA5 (red)  
219 in FLAG-tagged wild type (WT), p.Gln500Ter mutant or p.Ile309\_Glu311delinsMet mutant  
220 SLC26A7 in transiently transfected HEK293T cells. 4',6-diamidino-2-phenylindole, DAPI  
221 (blue) marks cell nuclei. WT protein colocalises with the plasma membrane protein IGTA5,  
222 however mutant proteins show predominantly cytosolic localisation.

223

224 **Supplementary Figure 11**

225

226

227

228

229

230

231

232

233

234

235

236

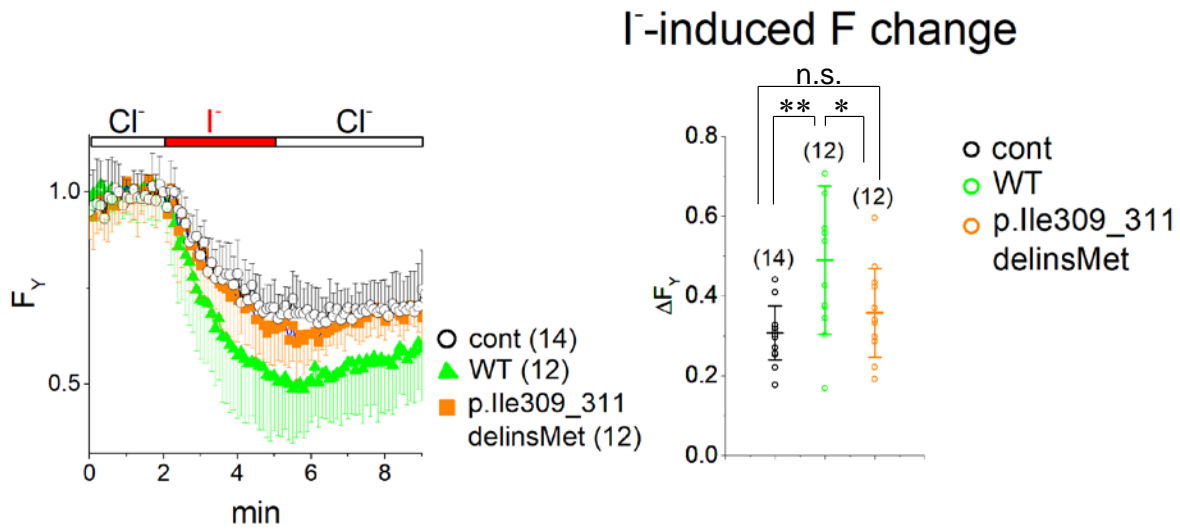

237 Supplementary Figure 11. (Left panel) The accumulation of  $I^-$ . Shown are time-lapse  
 238 changes in the normalised fluorescence intensity of YFP-HQ/IL ( $F_Y$ ) in cells expressing the  
 239 mutant YFP-HQ/IL alone (open circles) or YFP-HQ/IL with WT (green triangles) or  
 240 p.Ile309\_Glu311delinsMet mutant SLC26A7 (orange squares). Symbols and error bars  
 241 represent mean and S.D., respectively The NaI bath solution was perfused for 3 minutes, as  
 242 indicated by red bars. Numbers of cells are indicated in parentheses.(Right panel) Summary  
 243 of the  $F_Y$  change. Circles represent changes in  $F_Y$  in each cell at 3 minutes after the NaI  
 244 perfusion. Bars and error bars represent mean and S.D., respectively. Numbers of cells are  
 245 indicated in parentheses. \*,  $p < 0.05$ ; \*\*,  $p < 0.01$ ; n.s., not significant (WT against control:  
 246  $P = 0.0020$ , Tukey's test; WT against p.II309\_Glu311delinsMet mutant:  $P = 0.0359$ , Tukey's  
 247 test)

248

249 **Supplementary Figure 12**

250

251

252

253

254

255

256

257

258

259

260

261

**I<sup>-</sup>-induced F change**

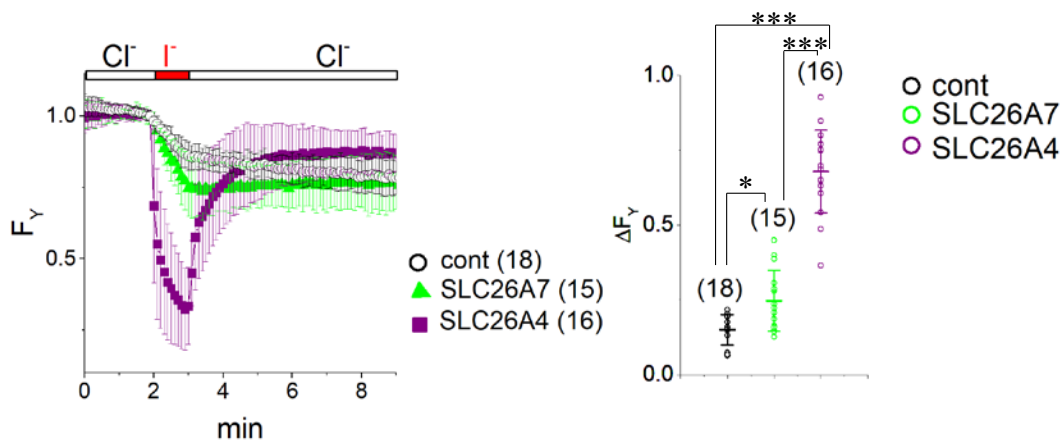

262 Supplementary Figure 12. (Left panel) The accumulation of I<sup>-</sup> is compared in cells  
263 expressing the mutant YFP-HQ/IL alone or YFP-HQ/IL with SLC26A7 WT (green  
264 triangles) or SLC26A4 WT (violet squares). Symbols and error bars represent mean and  
265 S.D., respectively. The NaI bath solution was perfused for 1 minute, as indicated by red bars.  
266 Numbers of cells are indicated in parentheses. (Right panel) Summary of the F<sub>Y</sub> change.  
267 Circles represent changes in F<sub>Y</sub> in each cell at 1 minute after the NaI perfusion. Bars and  
268 error bars represent mean and S.D., respectively. Numbers of cells are indicated in  
269 parentheses. \*, p < 0.05; \*\*\*, p < 0.001 (Tukey's test)

270

271 **Supplementary Table 1**

272 SLC26A7 expression in thyroid tissues. Abbreviations: +, positive; -, negative.

273

| <b>SLC26A7 immunohistochemistry</b> |                |                    | <b>SLC26A7 RT-PCR</b> |                       |
|-------------------------------------|----------------|--------------------|-----------------------|-----------------------|
| <b>Tissue</b>                       | <b>Cytosol</b> | <b>Apical side</b> | <b>Tissue</b>         | <b>SLC26A7 RT-PCR</b> |
| Thyroid-1                           | +              | +                  | Thyroid-4             | +                     |
| Thyroid-2                           | +              | +                  | Thyroid-5             | +                     |
| Thyroid-3                           | +              | -                  | Thyroid-7             | +                     |
| Thyroid-4                           | +              | -                  | Thyroid-10            | +                     |
| Thyroid-5                           | +              | +                  | Kidney-1              | +                     |
| Thyroid-6                           | +              | +                  | Kidney-2              | +                     |
| Thyroid-7                           | +              | +                  | Kidney-3              | -                     |
| Thyroid-8                           | +              | -                  | Kidney-4              | -                     |
| Thyroid-9                           | +              | -                  | Kidney-5              | +                     |
| Thyroid-10                          | +              | +                  | Kidney-6              | +                     |
|                                     |                |                    | Kidney-7              | +                     |

274

275

276 **Supplementary Table 2**

277

| Cell line                               | Total iodine in cells (µg/L) |
|-----------------------------------------|------------------------------|
| COS-7-SLC26A7 dox(-)                    | <25                          |
| COS-7-SLC26A7 dox(+)                    | <25                          |
| COS-7-SLC26A7 dox(-) SLC5A5 transfected | 520                          |
| COS-7-SLC26A7 dox(+) SLC5A5 transfected | 425                          |
| Nthy-SLC26A7 dox(-)                     | <25                          |
| Nthy-SLC26A7 dox(+)                     | <25                          |
| Nthy-SLC26A7 dox(-) SLC5A5 transfected  | 178                          |
| Nthy-SLC26A7 dox(+) SLC5A5 transfected  | 120                          |

dox, doxycycline

278

279
